# Supplementary material for: Structural and functional characterization of shaft, anchor, and tip proteins of the Mfa1 fimbria from the periodontal pathogen Porphyromonas gingivalis
Source: PubMed Central journal article supplement (PMC5789003; doi:10.1038/s41598-018-20067-z), 2018-01-29
Supplement: 41598_2018_20067_MOESM1_ESM.pdf [file 41598_2018_20067_MOESM1_ESM.pdf]

## SUPPLEMENTARY INFORMATION

### **Structural and functional characterization of shaft, anchor, and tip proteins of the Mfa1 fimbria from the periodontal pathogen *Porphyromonas gingivalis***

Michael Hall<sup>1</sup>, Yoshiaki Hasegawa<sup>2\*</sup>, Fuminobu Yoshimura<sup>2</sup> and Karina Persson<sup>1\*</sup>

<sup>1</sup>Department of Chemistry, Umeå University, Umeå, Sweden, SE-901 85

<sup>2</sup>Department of Microbiology, School of Dentistry, Aichi Gakuin University, 1-100 Kusumoto-cho, Chikusa-ku, Nagoya, Aichi 464-8650, Japan

\*Corresponding authors

E-mail: [yhase@dpc.agu.ac.jp](mailto:yhase@dpc.agu.ac.jp) (YH)

E-mail: [karina.persson@umu.se](mailto:karina.persson@umu.se) (KP)

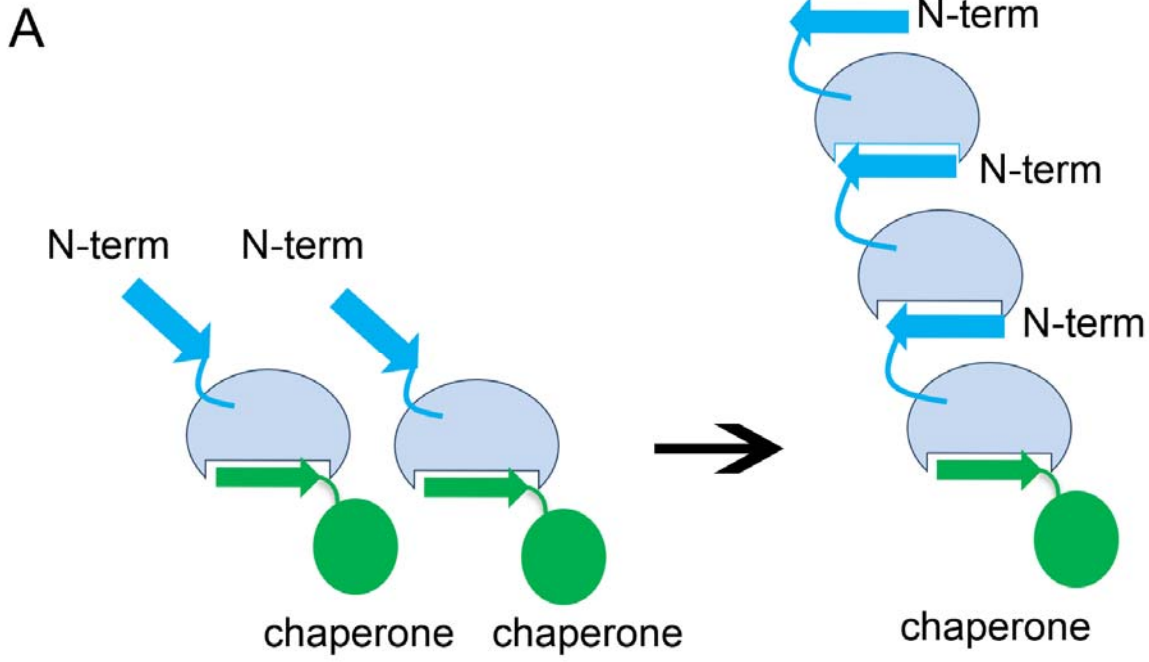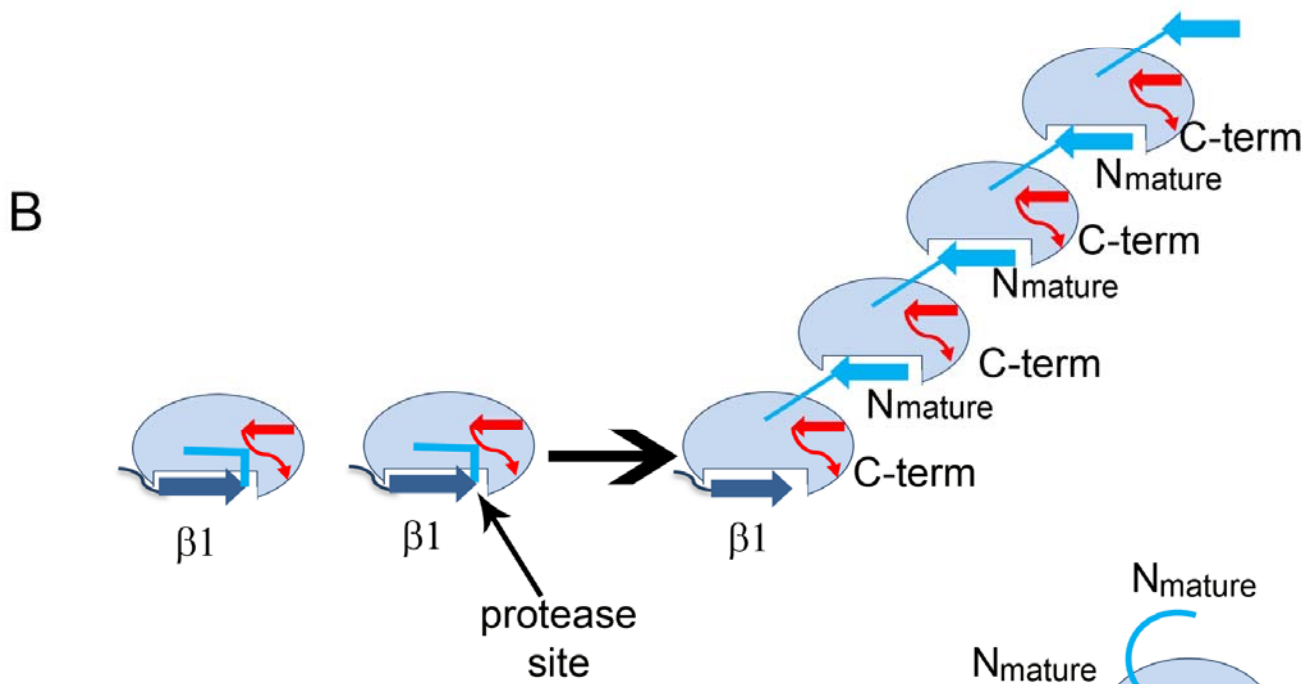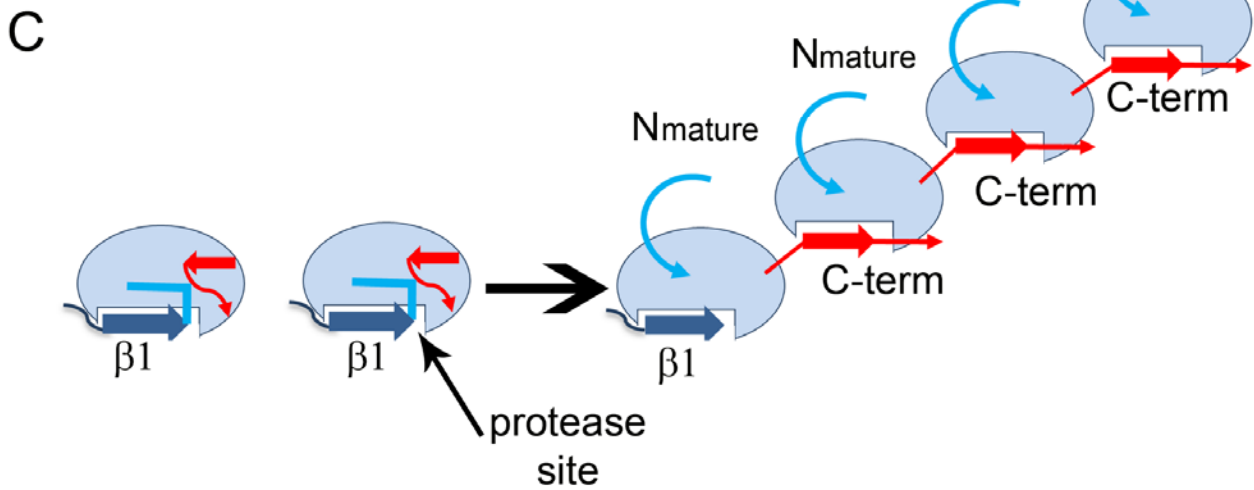

**Supplementary figure S1.** Examples of polymerization mechanisms. **(a)** A simplified overview of the chaperone-assisted polymerization of type-I fimbria. Fimbrial proteins are transported to the membrane in complex with a chaperone that donates a  $\beta$ -strand to an incomplete sheet of the fimbrial protein. During polymerization the chaperone  $\beta$ -strand is displaced by an N-terminal  $\beta$ -strand from a neighboring fimbrial protein. Note that the  $\beta$ -strand from the fimbrial protein is oriented in the opposite direction of the chaperone  $\beta$ -strand. The fimbrial protein is depicted in light blue, the chaperone in green and the N-terminal  $\beta$ -strand in turquoise.

**(b)** Hypothetical type-V polymerization, version 1. The fimbrial proteins are expressed with an internal chaperone, the  $\beta$ 1-strand, located in the N-terminal domain. A protease cleaves the loop that follows, creating a new terminus ( $N_{\text{mature}}$ ). During polymerization the  $\beta$ 1-strand is displaced by  $N_{\text{mature}}$  from a neighbouring fimbrial protein. Note that the orientation of the donated strand runs in the opposite direction of the internal chaperone, the  $\beta$ 1 strand, similar to the strand arrangement in type-I polymerization. The fimbrial protein is depicted in light blue,  $\beta$ 1 in dark blue,  $N_{\text{mature}}$  in turquoise and the C-terminus in red.

**(c)** Hypothetical type-V polymerization, version 2. As above the protein is expressed with an internal chaperone,  $\beta$ 1 that is cleaved off by a protease. During polymerization, the C-terminal  $\beta$ -strand and the following extended region elongate and form a long donor strand that reaches over both the N- and C-terminal domain. Note that in this model the displacing  $\beta$ -strand runs in the same direction as the internal chaperone,  $\beta$ 1. Coloring as in (b).

**β1β2-loop**

|      |     |                                                                                                                                                                                                                                                                                                                                                                                                                                |     |
|------|-----|--------------------------------------------------------------------------------------------------------------------------------------------------------------------------------------------------------------------------------------------------------------------------------------------------------------------------------------------------------------------------------------------------------------------------------|-----|
| Mfa1 | 21  | SKEGNGPDPDN-AAKSYMSMTLSMFMGSAAGDGGDQANPDYHYV-----GEWAG---KDKIEKVSIIY                                                                                                                                                                                                                                                                                                                                                           | 79  |
| Mfa2 | 30  | -DKMIYDNYDD--CPRGVYVNFYSQ-----TECA-ENPSY-PAEVARLNVIY                                                                                                                                                                                                                                                                                                                                                                           | 70  |
| Mfa3 | 22  | -DRGVDPQDPDLPQPDVYLLVNAIAAHT-----NGEESINMDAE-----DFEDRVHSLAML                                                                                                                                                                                                                                                                                                                                                                  | 70  |
| Mfa4 | 20  | --SKNNPSEP--VEDRSIEISIRVD-----DFTKTGETVRYEINQGS-AAERLITINLYLL                                                                                                                                                                                                                                                                                                                                                                  | 69  |
|      |     |                                                                                                                                                                                                                                                            |     |
|      |     |                                                                                                                                                                                                                                                                                                                                                                                                                                |     |
| Mfa1 | 80  | MVPQGGPGLVESAEEDLD-FG---TYENPTIDPATHNAILKPKKGIVNSAVGKTVKVVVLLNDIAGKAK                                                                                                                                                                                                                                                                                                                                                          | 145 |
| Mfa2 | 71  | AFDKDGIL-RSANVFED-----VQLS--AA-----KEWLIPL--EKDGLYTIFAWGNIDDHYNI                                                                                                                                                                                                                                                                                                                                                               | 119 |
| Mfa3 | 71  | VFDSNTGEKVAEHFSSS-IG---SGTSTYV-----F'TVKL--KPGQRDFFFVANIPNM--Q                                                                                                                                                                                                                                                                                                                                                                 | 118 |
| Mfa4 | 70  | LFDQSGAN-PAKYI IAGNTFSGGIWLPDD-----MKV--KLDMTQSEAGERKVVVAVNDNAV-K                                                                                                                                                                                                                                                                                                                                                              | 125 |
|      |     |      |     |
|      |     |                                                                                                                                                                                                                                                                                                                                                                                                                                |     |
| Mfa1 | 146 | ALLAN-VNAADFDAKFKEIIELSTQAQALGTVADGPNPAT-AAGKIAKNGTDETIMTCLQP-SDALT                                                                                                                                                                                                                                                                                                                                                            | 212 |
| Mfa2 | 120 | GEIKIGET---TKQQ--VLMRLKQ--DGK-----W-AT--NID-----GTTLWYA-TSPVVELK                                                                                                                                                                                                                                                                                                                                                               | 162 |
| Mfa3 | 119 | TAMAS-IVNKSMDNHFMQVFRDLDD-----PIHYH--NATNN--NGFPMSR-MYSNQTVT                                                                                                                                                                                                                                                                                                                                                                   | 166 |
| Mfa4 | 126 | TALDA-VA--NESDLQTVKRTTA-----M-PWSTDIA-----SPFLMSG--NKTHDFL                                                                                                                                                                                                                                                                                                                                                                     | 167 |
|      |     |       |     |
|      |     |                                                                                                                                                                                                                                                                                                                                                                                                                                |     |
| Mfa1 | 213 | -----IEAAVSEANAIAGIKNQAKVTEISVARAMVSTKAQSYEIKATTQIGEIAAGSVLA                                                                                                                                                                                                                                                                                                                                                                   | 268 |
| Mfa2 | 163 | NMEDGAD---QYIH-----TRANLREYTNRVTVSVDS-----                                                                                                                                                                                                                                                                                                                                                                                     | 191 |
| Mfa3 | 167 | -----IGGTITQPLPF-----KPDGENNVKLOISVVAKLDVNIIVE-----G                                                                                                                                                                                                                                                                                                                                                                           | 201 |
| Mfa4 | 168 | -----ANRLL-----DNVPLVRAIAKVELNISL-SEKF-----Q                                                                                                                                                                                                                                                                                                                                                                                   | 195 |
|      |     |                                                                                                                                                                                                                                                             |     |
|      |     |                                                                                                                                                                                                                                                                                                                                                                                                                                |     |
| Mfa1 | 269 | TIT-----DIRWVVAQGERRQYL--SKRGTVPENTWVTPGSGFVPTSSTFHTNATEYYDYAGLWED                                                                                                                                                                                                                                                                                                                                                             | 328 |
| Mfa2 | 192 | LPH-----PENYEIKL-ASSNGSYRFDGTV-----AKA-----DSTYY-----                                                                                                                                                                                                                                                                                                                                                                          | 223 |
| Mfa3 | 202 | VEN-----LQKIELCNANVHYRL--VPNQ-----SEPI-----QFYGPV-----                                                                                                                                                                                                                                                                                                                                                                         | 233 |
| Mfa4 | 196 | IVPIIVNGSLSEFKFRYVNFDKETIV--VKPT-----TKPD-----NLISS-----A                                                                                                                                                                                                                                                                                                                                                                      | 235 |
|      |     |                                                                                                                                                                                                                                                              |     |
|      |     |                                                                                                                                                                                                                                                                                                                                                                                                                                |     |
| Mfa1 | 329 | HN---TNEAVISGTQVPTLADYQLQDVTGELANAL-----SGKFLLPN-THKSGANAASSDY                                                                                                                                                                                                                                                                                                                                                                 | 381 |
| Mfa2 | 224 | -----PGETKVVG-----DSTCRAFFTTLKLESGH-----                                                                                                                                                                                                                                                                                                                                                                                       | 248 |
| Mfa3 | 234 | -----ELRR-----VGAT-----NQWLGYPMEA-IVESTKWWGNTGN                                                                                                                                                                                                                                                                                                                                                                                | 264 |
| Mfa4 | 236 | NGVWPQIT---DWTVWG--ASLNTSPA--PDAGTYTLDANGKVTALRIVTYLNER-----DSK                                                                                                                                                                                                                                                                                                                                                                | 287 |
|      |     |                                                                                                                                                                                                                                                                                                                                           |     |
|      |     |                                                                                                                                                                                                                                                                                                                                                                                                                                |     |
| Mfa1 | 382 | -KRGNTAYVLVRAKFTPKKEAFIDRGKTYSDNTAVPEYVAGEDDFVGENGQFYVSMKSVTDPKVGGVAGM                                                                                                                                                                                                                                                                                                                                                         | 450 |
| Mfa2 | 249 | ---ENTLSVTHKP-----                                                                                                                                                                                                                                                                                                                                                                                                             | 258 |
| Mfa3 | 265 | AENKPINFFRLTTRG-----                                                                                                                                                                                                                                                                                                                                                                                                           | 279 |
| Mfa4 | 288 | ---GATVEVALPRV-----DDG                                                                                                                                                                                                                                                                                                                                                                                                         | 301 |
|      |     |                                                                                                                                                                                                                                                                                                                                             |     |
|      |     |                                                                                                                                                                                                                                                                                                                                                                                                                                |     |
| Mfa1 | 451 | KAHKYVKGVLYYAWLNPST----TSPDSW-----WNSPVVRNNIYHIHIKSIKGLFNWMLVLPD                                                                                                                                                                                                                                                                                                                                                               | 507 |
| Mfa2 | 259 | -----TGREIFRTDLVGAILS--SQYAQ-----NINLRCINDFDIRLVAHHCNCPD-----                                                                                                                                                                                                                                                                                                                                                                  | 302 |
| Mfa3 | 280 | -----GLVYDVPIITHEGAIPGGQYLPFAKGLLADKPSYTVYRNRHYIYRIKTLPLD-----                                                                                                                                                                                                                                                                                                                                                                 | 330 |
| Mfa4 | 302 | TLPPPEFGPELYRLPLP-----DKILRNHWYKYEVEI-----                                                                                                                                                                                                                                                                                                                                                                                     | 333 |
|      |     |                                                                                                                                                                                                                                                        |     |
|      |     |                                                                                                                                                                                                                                                                                                                                                                                                                                |     |
|      |     | <b>proline rich-region</b>                                                                                                                                                                                                                                                                                                                                                                                                     |     |
| Mfa1 | 508 | FDPSNPENPNPNPNPDEPGTVPVPTDPENPLPDDQDTFMSVEVTVLPK-----                                                                                                                                                                                                                                                                                                                                                                          | 555 |
| Mfa2 | 303 | -----DTYVVVQIWING--ML-----                                                                                                                                                                                                                                                                                                                                                                                                     | 316 |
| Mfa3 | 331 | -----KIEVKYSICDNNIVTNDTYMGYGYNVGVDEQGNV                                                                                                                                                                                                                                                                                                                                                                                        | 364 |
| Mfa4 |     | -----                                                                                                                                                                                                                                                                                                                                                                                                                          |     |
|      |     |                                                                                                                                                                                                                                                                                                                                            |     |
|      |     |                                                                                                                                                                                                                                                                                                                                                                                                                                |     |
| Mfa1 | 556 | -----VHSYEVDL--                                                                                                                                                                                                                                                                                                                                                                                                                | 563 |
| Mfa2 | 317 | -----IHSYEIEL--                                                                                                                                                                                                                                                                                                                                                                                                                | 324 |
| Mfa3 | 365 | TITNTMQNCDPHVVRLVAKNGAYFGSQPTDTSVEFTELANGASQTFKVNKDAVAVGSAYLEVYVNPDLNA                                                                                                                                                                                                                                                                                                                                                         | 434 |
| Mfa4 |     | -----                                                                                                                                                                                                                                                                                                                                                                                                                          |     |
|      |     |                                                                                                                                                                                                                                                                                                                                                                                                                                |     |
| Mfa1 |     | -----                                                                                                                                                                                                                                                                                                                                                                                                                          |     |
| Mfa2 |     | -----                                                                                                                                                                                                                                                                                                                                                                                                                          |     |
| Mfa3 | 435 | TGVVPDKVFIKK                                                                                                                                                                                                                                                                                                                                                                                                                   | 446 |
| Mfa4 |     | -----                                                                                                                                                                                                                                                                                                                                                                                                                          |     |

**Supplementary figure S2.** Structure assisted multiple sequence alignment of proteins building up the Mfa1 fimbria performed using PROMALS3D <sup>1</sup>. The alignment is based on the precursor sequences of each protein and the mMfa1, Mfa2, mMfa3 and Mfa4 (pdb code: 5dhm) structural models. Consensus secondary structure features are indicated as cylinders ( $\alpha$ -helices) and arrows ( $\beta$ -strands) below the alignment. Amino acids of specific interest are highlighted red (RgpA/B cleavage site), green (conserved tryptophan), purple (tryptophan interacting residues) and yellow (disulphide forming amino acids in Mfa2).

A

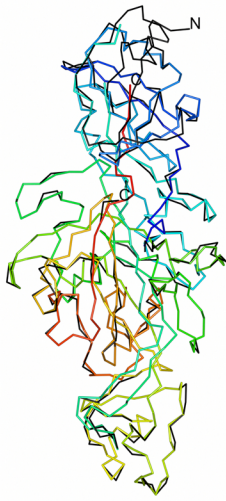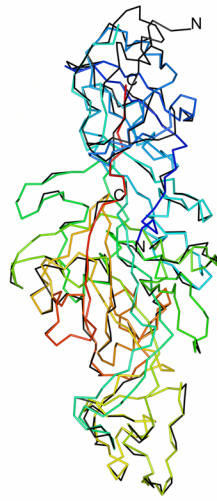

mMfa1/Mfa1 $\Delta$ 9

B

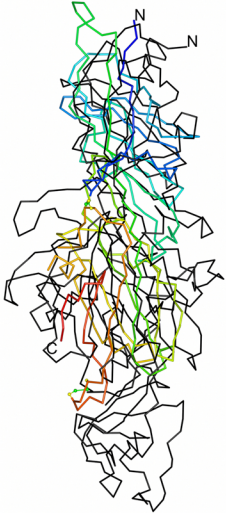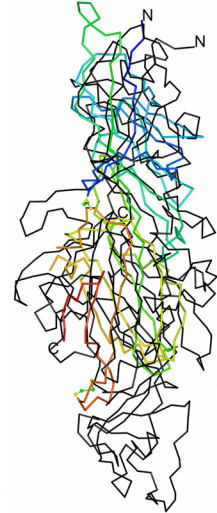

Mfa2/Mfa1 $\Delta$ 9

C

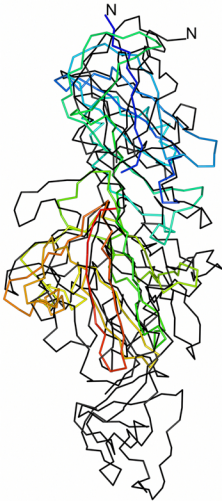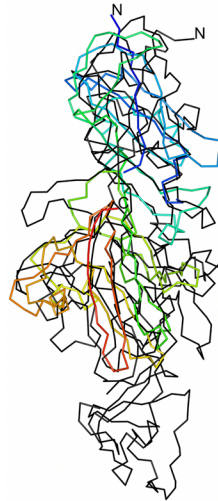

Mfa3/Mfa1 $\Delta$ 9

D

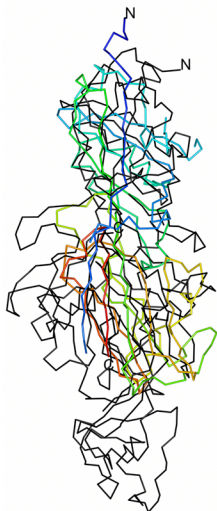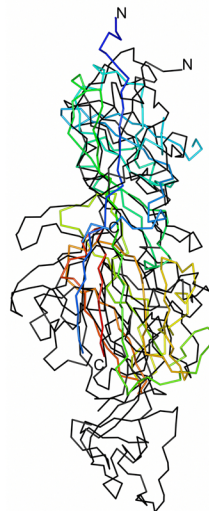

Mfa4/Mfa1 $\Delta$ 9

**Supplementary figure S3.** Structural comparison of the proteins building up the Mfa1 fimbria. The structural model of pMfa1 $\Delta$ <sub>9</sub> (shaft) is superimposed on the structures of **(a)** mMfa1 (shaft); **(b)** Mfa2 (anchor); **(c)** Mfa3 (tip) and **(d)** Mfa4 (tip). pMfa1 $\Delta$ <sub>9</sub> is depicted in black and the other structures are blended from the N-terminus (blue) to the C-terminus (red). The overlays are shown as C $\alpha$ -traces in stereo.

A

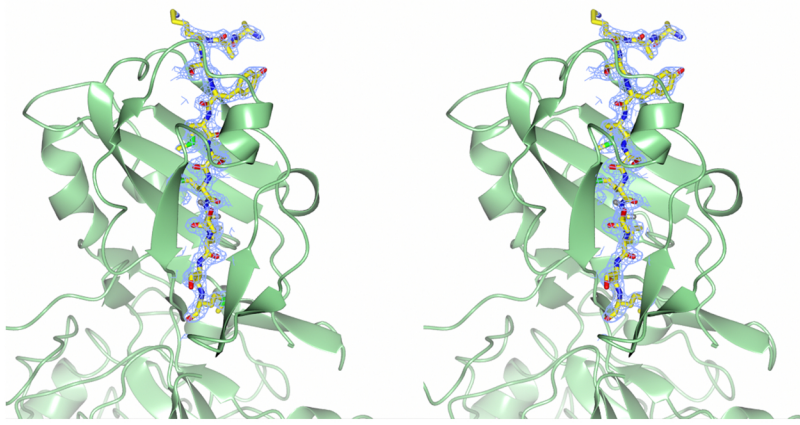

pMfa1 $\Delta$ 9

B

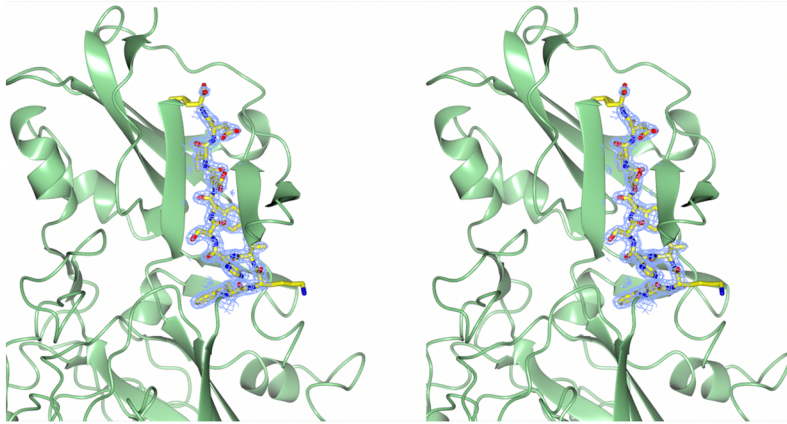

mMfa1

C

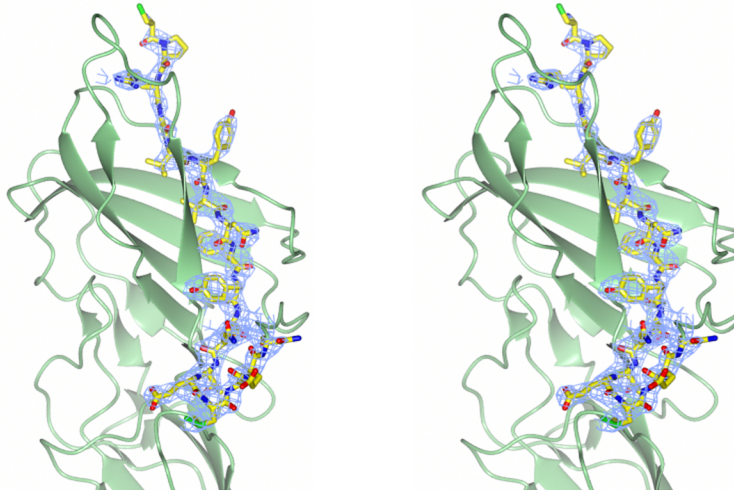

Mfa2

D

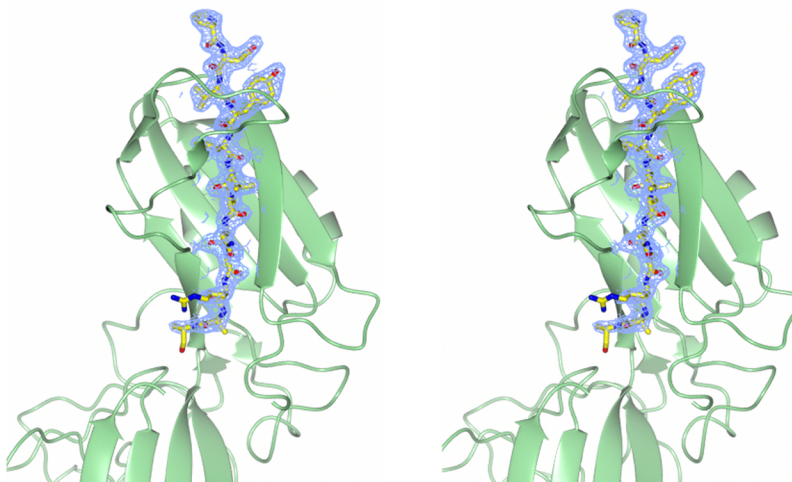

pMfa3



**Supplementary figure S4.** Highlighted N- and C-terminal structural features in  $\beta$ -sheet 1. **(a)** The N-terminal extension of pMfa1 $\Delta$ 9, **(b)** the final strand of mMfa1, **(c)** the N-terminal extension of Mfa2, anchored by a disulphide bond and **(d)** the N-terminal extension of pMfa3. All N- and C-terminal structural features are shown as stick models in a 2fo- $f_c$  map contoured at  $1\sigma$  in stereo.



**Supplementary figure S5.** Structure assisted multiple sequence alignment of Mfa1 and the related shaft proteins BovFim3A from *B. ovatus* (pdb code: 4jrf), *P. distasonis* BdiFim3A (3liu), *B. eggerthii* BegFim1A (4gpv) and FimA from *P. gingivalis* strain W83 (4q98) performed using PROMALS3D. Consensus secondary structure features;  $\alpha$ -helices (h) and  $\beta$ -strands (e) are indicated below the alignment.

A

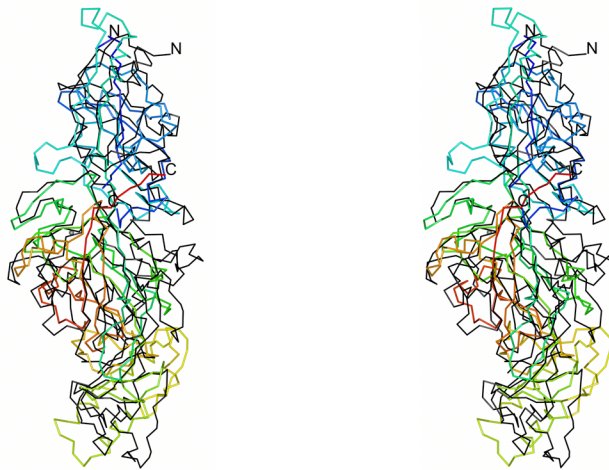

BovFim3A  
(*B. ovatus*)  
/Mfa1 $\Delta$ 9

B

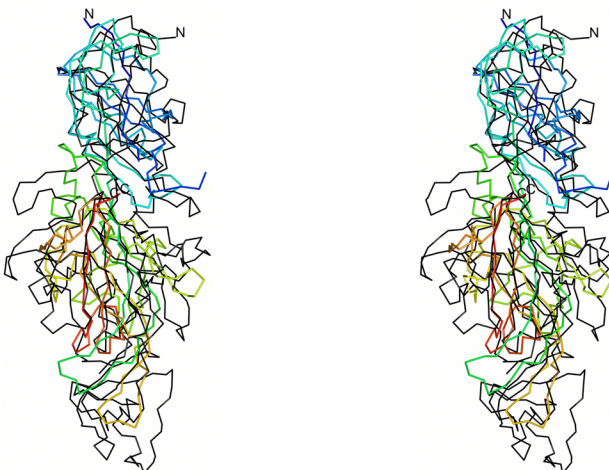

BdiFim3A  
(*P. distasonis*)  
/Mfa1 $\Delta$ 9

C

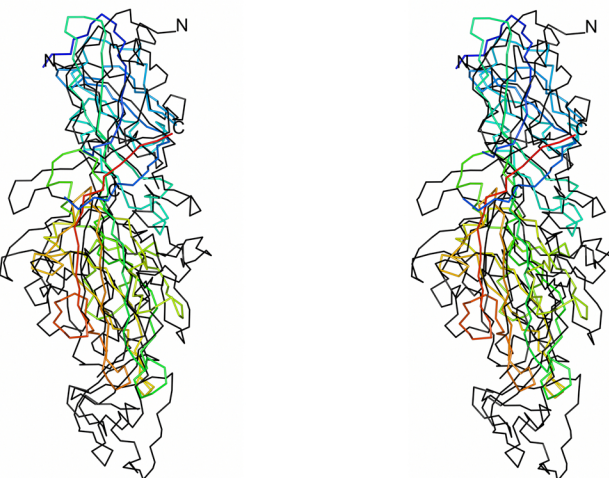

BegFim1A  
(*B. eggerthii*)  
/Mfa1 $\Delta$ 9

D

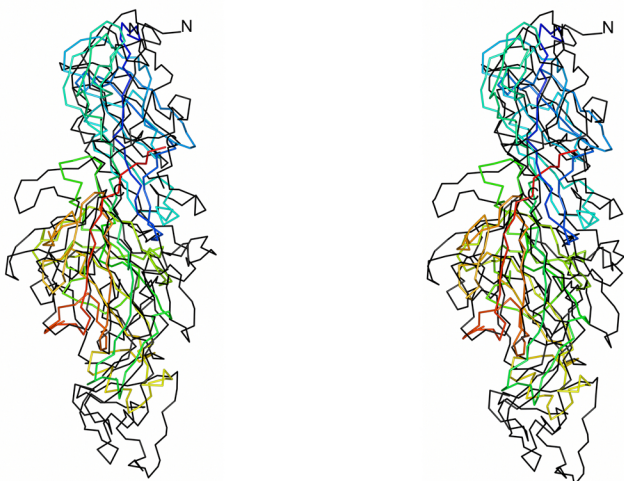

FimA  
(*P. gingivalis* W83)  
/Mfa1 $\Delta$ 9

**Supplementary figure S6.** Comparison between pMfa1 $\Delta$ 9 and structurally related shaft proteins. pMfa1 $\Delta$ 9 is superimposed on **(a)** fimbrial shaft protein BovFim3A from *B. ovatus* **(b)** *P. distasonis* BdiFim3A **(c)** *B. eggerthii* BegFim1A and **(d)** FimA from *P. gingivalis* strain W83. pMfa1 $\Delta$ 9 is depicted in black and the other structures are blended from the N-terminus (blue) to the C-terminus (red). The overlays are shown as C $\alpha$ -traces in stereo.



**Supplementary figure S7.** Structure assisted multiple sequence alignment of Mfa2 and the related anchor proteins BthFim2B and BthFim3B from *B. thetaiotaomicron* (pdb codes: 3gf8 and 4qdg) and BovFim2B from *B. ovatus* (3pay) performed using PROMALS3D. Consensus secondary structure features;  $\alpha$ -helices (h) and  $\beta$ -strands (e) are indicated below the alignment.

A

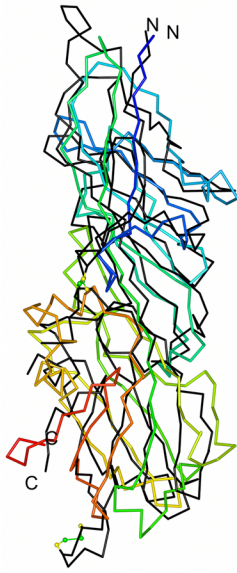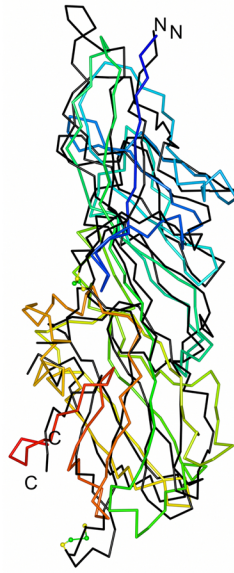

BthFim2B  
(*B. thetaiotaomicron*)  
/Mfa2

B

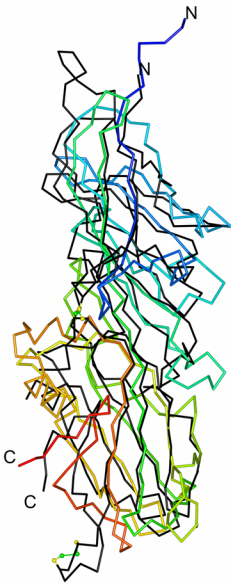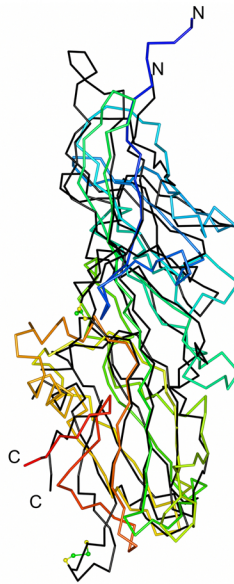

BthFim3B  
(*B. thetaiotaomicron*)  
/Mfa2

C

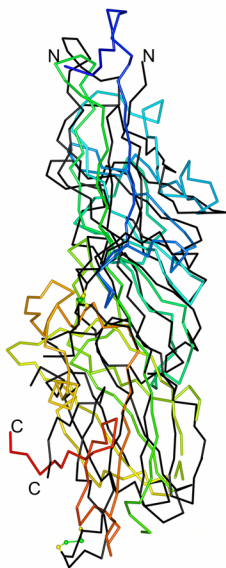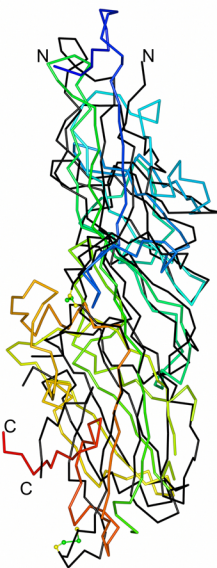

BovFim2B  
(*B. ovatus*)  
/Mfa2



**Supplementary figure S8.** Comparison between Mfa2 and structurally related anchor proteins. Mfa2 is superimposed on anchor proteins from *B. thetaiotaomicron* **(a)** BthFim2B and **(b)** BthFim3B and **(c)** *B. ovatus* (BovFim2B). Mfa2 is depicted in black and the other structures are blended from the N-terminus (blue) to the C-terminus (red). The overlays are shown as  $C\alpha$ -traces in stereo.

Mfa3 1 DRGVDPQPDLPDVLV-LVNARA--TNGE--ESINMDAEDFEDRVHSLAMLVFDSN--TGEKVAEHF 63  
 FimA 1 -----VVEETNATVVSFIKSGE-----SRAVGDDLTDAKITKLTAMVYAG----QVQEGIKT 49  
 BovFim2C 1 -----TRAQL-SIDLNVN-----EQQEKINSMRFIVFGSTPGGVRDLVNEH 41  
 BdiFim1A 1 -----VLEKAQQ-LALAIKSET-----TPTDADVNTLTVGVFGV---DGWS-VIYT 41  
 BdiFim1C 1 -----PLEGAK-LSVAVKASGTATKAYNPNDVNE-LEEGEAYINNLAUVVFNET--GTELLGYKW 56  
Consensus ss: eeeeeee eeeeeee hhh

Mfa3 64 SSSIGSGTSTYV---FTVKLK-PGQ---RDFFFVANIPN-MQTAMASIVNKSDMNHFMQVFRDLDPH- 123  
 FimA 50 VEEED-DGGVLK---VEGIPCKSGANNRVLLVVVANHN---YELTGKS---LNEVEALTTSLTAEN- 106  
 BovFim2C 42 ILLST-PETATDID-AQLLEVTSSND---ILVVVIANEPQSLTSQLDGIAN---LLTLQEMIIDISSILN 103  
 BdiFim1A 42 KDATT-PNSDGTKDVGVPQEVYAGEA---HVVVVVANAAPVIQTELAQAKD---ITDFIETTINLSDE-- 102  
 BdiFim1C 57 EALSG-AEHSAI---IADVPTTKAVR---ARIIVLANVPR---DLLSTVST---YDEFQTRLVDLSSQ-- 111  
Consensus ss: hh ee ee eeeeeee hhhhhhh hhhhhhhhh

Mfa3 124 -YHNATNNNGF-PMSRMYSNQ--TVTI-GGTITQP-----LFPKPDGENNVKLQ--RNVAK 172  
 FimA 107 --QNNAKNNLIIMTGKSAAF--TIKP-GSNHYGYGG-TAS-----DNLVVSSAGTPLAVTTRVHVHAG 164  
 BovFim2C 104 SDGQIISATGM-PMTGVIRDI--SIAP-DETKTV-----QMVIE--RAVAR 143  
 BdiFim1A 103 ----TLTKGL-TMSSKVLVDV--TLVANTNYIGYDDEVGDIIVKDISGKEVY--GAGPVLV--RDVAS 160  
 BdiFim1C 112 ----SQT--NL-TMSSQVIVTKSALSE-EDNYLGYTDLGDQ-----NVDG--ISDPILLT--RVAAR 161  
Consensus ss: eee eeee ee e e eeeee eeee ee

Mfa3 173 LDVNIV-EGVEN-----LQKIELCNANVHYRLV-----PN 201  
 FimA 165 ISFAGVEEEVNMMATTQYQYQNYSSFKKPA-DAKIAALVAKKDSKIFG-----NSLV 217  
 BovFim2C 144 VDV-FIEAIDGGA-----VTGYTAGSTSVTLHNFSDSYFVMGNVNGTRDNADSSKNYKGV 199  
 BdiFim1A 161 IALAGA-DIGN--PENANYES---KSFVL---KEVFIASAKGVSSVASTEWEW-----GTIE 207  
 BdiFim1C 162 IDLVNI-STRF---AGTPFAG---REVR---IDAVGIYNMKTksyYFSEADW-----GETE 207  
Consensus ss: eee ee ee eeeeeee ee

Mfa3 202 QSEPI-----QFYGPV-----ELRRVG-----AT 220  
 FimA 218 SNTTNN-----AYLYGVQQ-----TPAGLYTPDAAGETYELEASLNTNYA-----258  
 BovFim2C 200 KEDVS-----ESNLLTHS-----WTAATTE-TWAYSSAPGAENRK 233  
 BdiFim1A 208 KDFFGDTHFGYLDYKVGLLFLTSNNIDEEGSYKKG---LQTKYDALAKKHVEN-----DPA 261  
 BdiFim1C 208 APDA-----VRNSE-----DTSFEDLLVNDGT----SISN 233  
Consensus ss: eeeee

Mfa3 221 NQWLGYMPEAIVESTKWWGNTGNAB-NKPIFFF--RLTRG-----G 259  
 FimA 259 VGAGFYVLESKYDDASN-----ELRPTILCCIIYGGKLLDKDGNPLTTEPALTDAINAGFCDDGDT 319  
 BovFim2C 234 LLCsfyTAERLF--KSD-----YSDRLSIS--MANVLKGPSDV-----T 268  
 BdiFim1A 262 LNHEFYVYENTKGEVKSg-ESNVNEAYANHTLL--IVKGDYTYLPQAK---ESIT-----KEN 314  
 BdiFim1C 234 TPFVHYVMENMKS-----DDHTMI--AVKATLRGNSSYQ-----DHT 268  
Consensus ss: eeeee h ee eeee

Mfa3 260 LVYDVPIITHEGAIPIGGQYLPFAKGLLA-----DKPSY-TVYRNR-HYI-YRIKTLPD-----309  
 FimA 320 TYPVVLVNYD----GNGYI---YSSGA--ITQQGQN-KIVRNNHYKIKSLNITGPGT-----NT 369  
 BovFim2C 269 GITGKVIESV-----TKVDGTGSPTAQPFTEIRRNN-VYQ-VTARVGKI-----310  
 BdiFim1A 315 CYYAIPVGEE-----VTIDG--TEKRSKF-YVQRNY-KYEEISLTIIGPGS-----EI 358  
 BdiFim1C 269 KIFTAVINAG-----GL----QNGYDHN-FIRRY-VY-RLRIYFDGESFDNIPVTPPE 315  
Consensus ss: eeeeeee eeee eeeeeeeee

Mfa3 310 -----KIEVKYS--ICDWNIVTNDTYMGYGYNVGVDEQGNVITITNTMQNCDPHVRLVAKNGA 365  
 FimA 370 PENFQQPPVQANLNNVTCCQVTPW-----394  
 BovFim2C 311 -----GIQILTI--SVED-----321  
 BdiFim1A 359 PYD--PMI--STNV-SASVK-VEPW-----377  
 BdiFim1C 316 PEV-----DTN-LNIAVQ--VVGW-----331  
Consensus ss: eeeeeee eeee

Mfa3 366 YFGSQPTDTSVEFTELANGASQTFKVNKDAVAVGSAYLEVYVNPDLNATGVVPDKVFIKK 425  
 FimA 395 -----VVVNQ-----399  
 BovFim2C 322 -----W-----322  
 BdiFim1A 378 -----N-----378  
 BdiFim1C 332 -----GPVMQH-----337  
Consensus ss: ee

**Supplementary figure S9.** Structure assisted multiple sequence alignment of Mfa3 and the structurally related proteins BdiFim1C from *P. distasonis* (pdb code: 4jg5), BovFim2C from *B. ovatus* (3up6), BdiFim1A from *P. distasonis* (3liu) and FimA from *P. gingivalis* W83 (4q98) performed using PROMALS3D. Consensus secondary structure features;  $\alpha$ -helices (h) and  $\beta$ -strands (e) are indicated below the alignment.

A

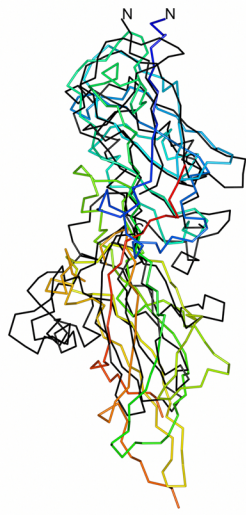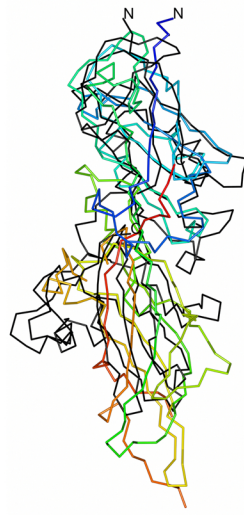

BdiFim1C  
(*P. distasonis*)  
/Mfa3

B

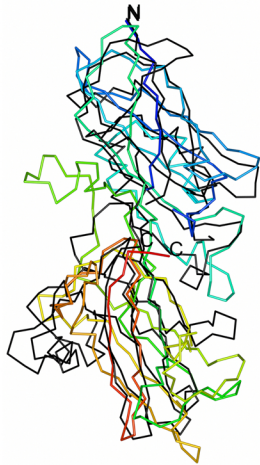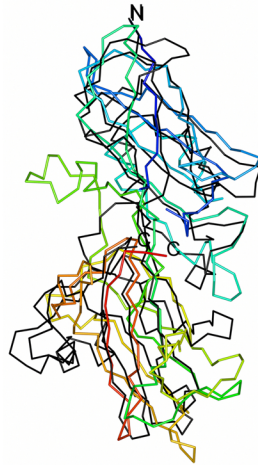

BovFim2C  
(*B. ovatus*)  
/Mfa3

C

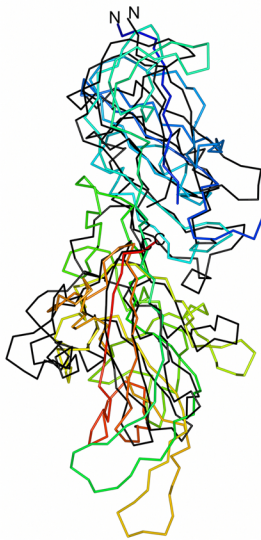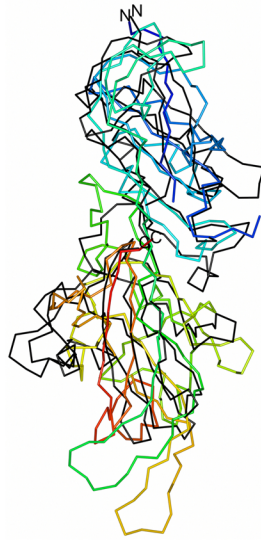

BdiFim1A  
(*P. distasonis*)  
/Mfa3

D

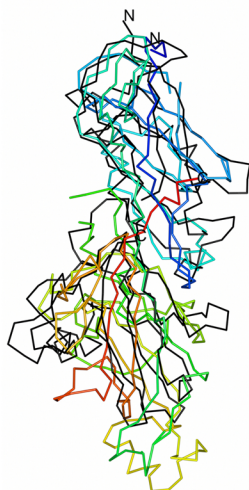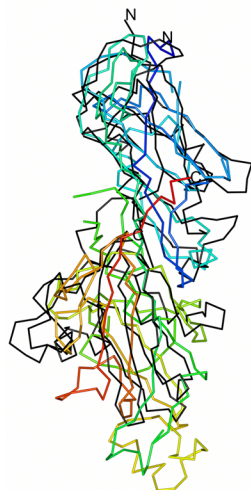

FimA  
(*P. gingivalis* W83)  
/Mfa3

**Supplementary figure S10.** Comparison between Mfa3 and structurally related proteins. Mfa3 is superimposed on **(a)** a tip protein from *P. distasonis* (BdiFim1C ), **(b)** a shaft protein from *B. ovatus* (BovFim2C), **(c)** a fimbrial protein of unknown function from *P. distasonis* (BdiFim1A ) and **(d)** the shaft protein FimA from *P. gingivalis* W83. Mfa3 is depicted in black and the other structures are blended from the N-terminus (blue) to the C-terminus (red). The overlays are shown as C $\alpha$ -traces in stereo.

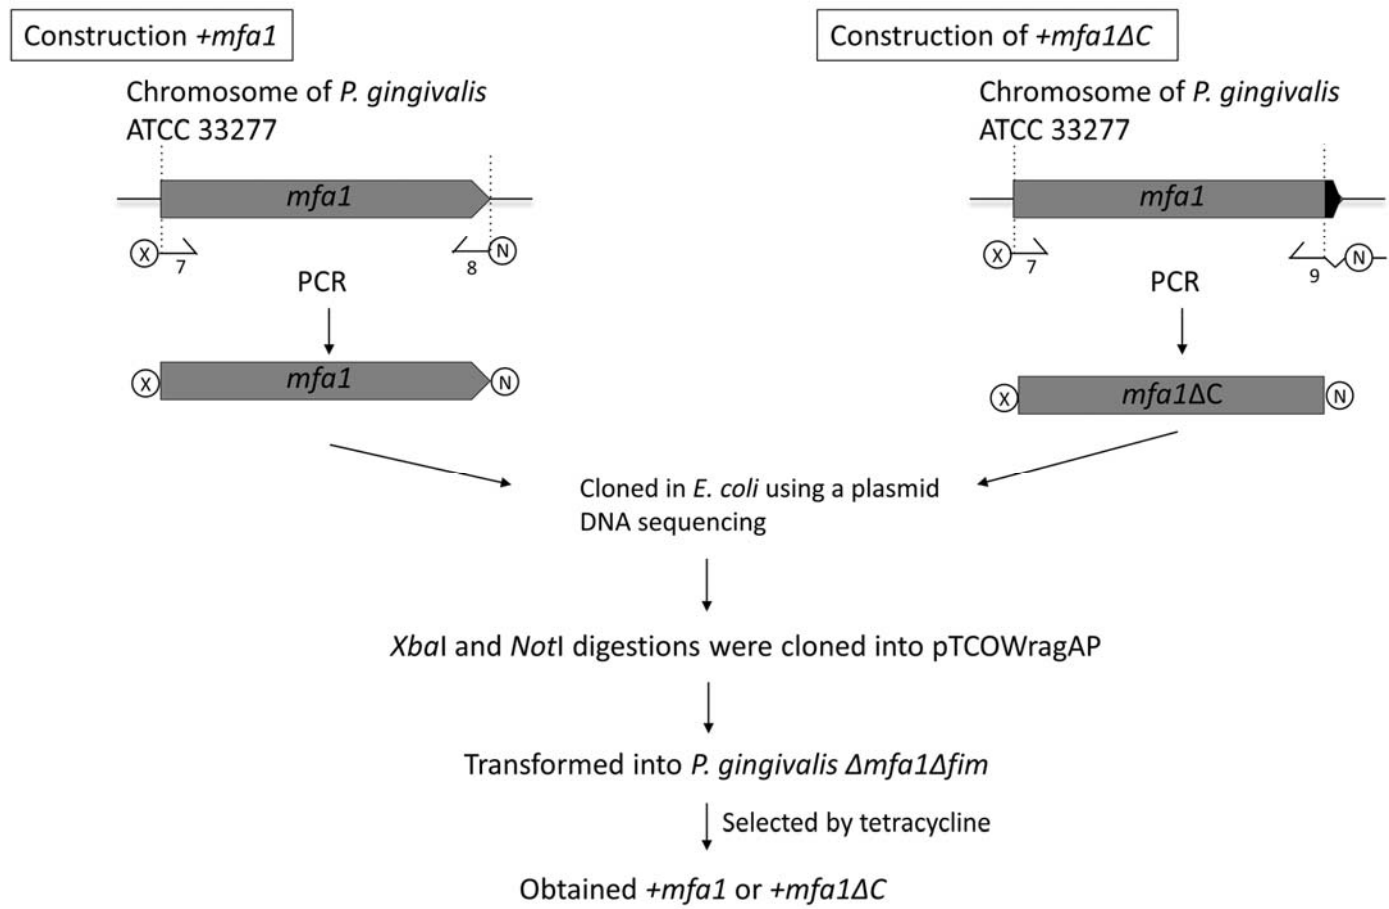

**Supplementary figure S11.** Construction of +*mfa1* and +*mfa1*ΔC *P. gingivalis* strains. Small arrows indicate the annealing sites of primers. X and N show *Xba*I and *Not*I restriction sites, respectively.

### Construction of *+mfa1R236A*

Chromosome of *P. gingivalis*  
ATCC 33277

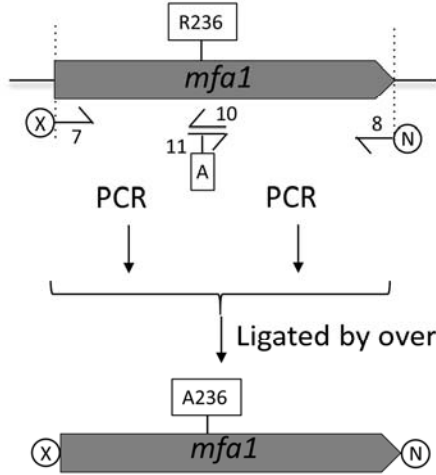

### Construction of *+mfa1W554A*

Chromosome of *P. gingivalis*  
ATCC 33277

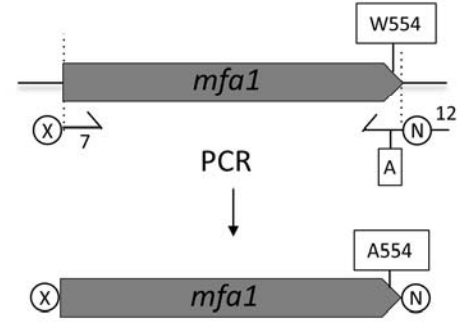

Cloned in *E. coli* using a plasmid  
DNA sequencing

*Xba*I and *Not*I digestions were cloned into pTCOWragAP  
and transformed into *P. gingivalis*  $\Delta mfa1\Delta fim$   
Obtained *+mfa1R236A* or *+mfa1W554A*

**Supplementary figure S12.** Construction of *+mfa1R236A* and *+mfa1W554A* *P. gingivalis* strains.

Small arrows indicate the annealing sites of primers. X and N show *Xba*I and *Not*I restriction sites, respectively

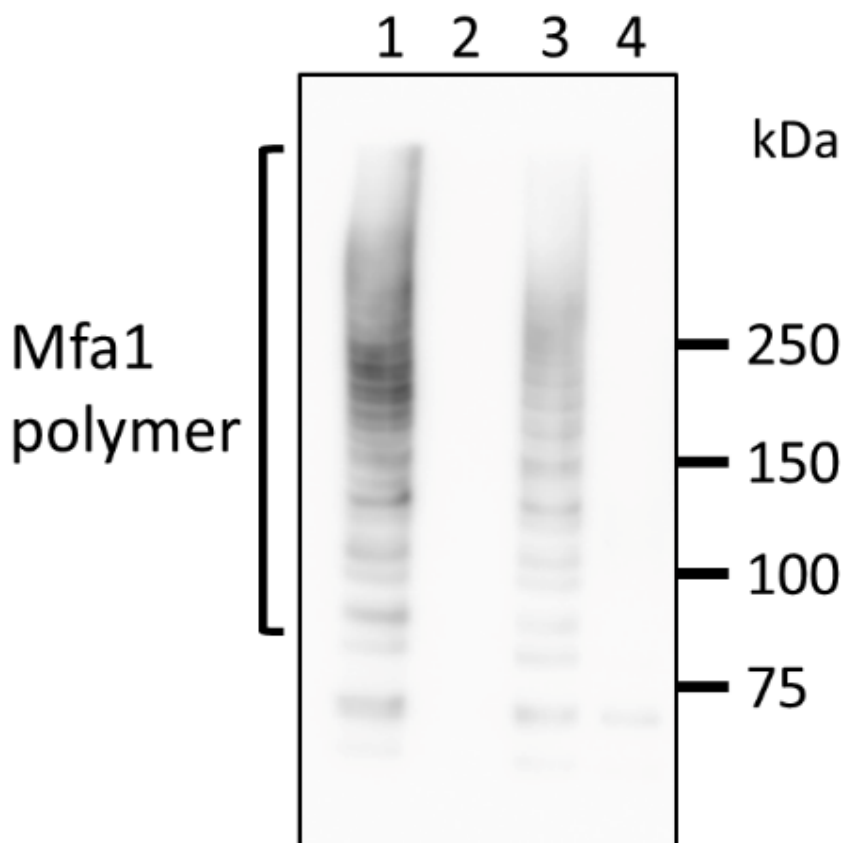

**Supplementary figure S13.** Analysis of Mfa1 denaturation at 42°C. Whole cell lysates were solubilized in SDS-buffer (containing 2-mercaptoethanol), heated to 42°C for 10 min, separated by SDS-PAGE, blotted to a PVDF membrane and probed with a polyclonal Mfa1 fimbriae antibody. Lanes: 1, JI-1; 2,  $\Delta mfa1\Delta fim$ ; 3, +*mfa1*; 4, +*mfa1* $\Delta C$ .



## Construction of *+mfa3ΔC*

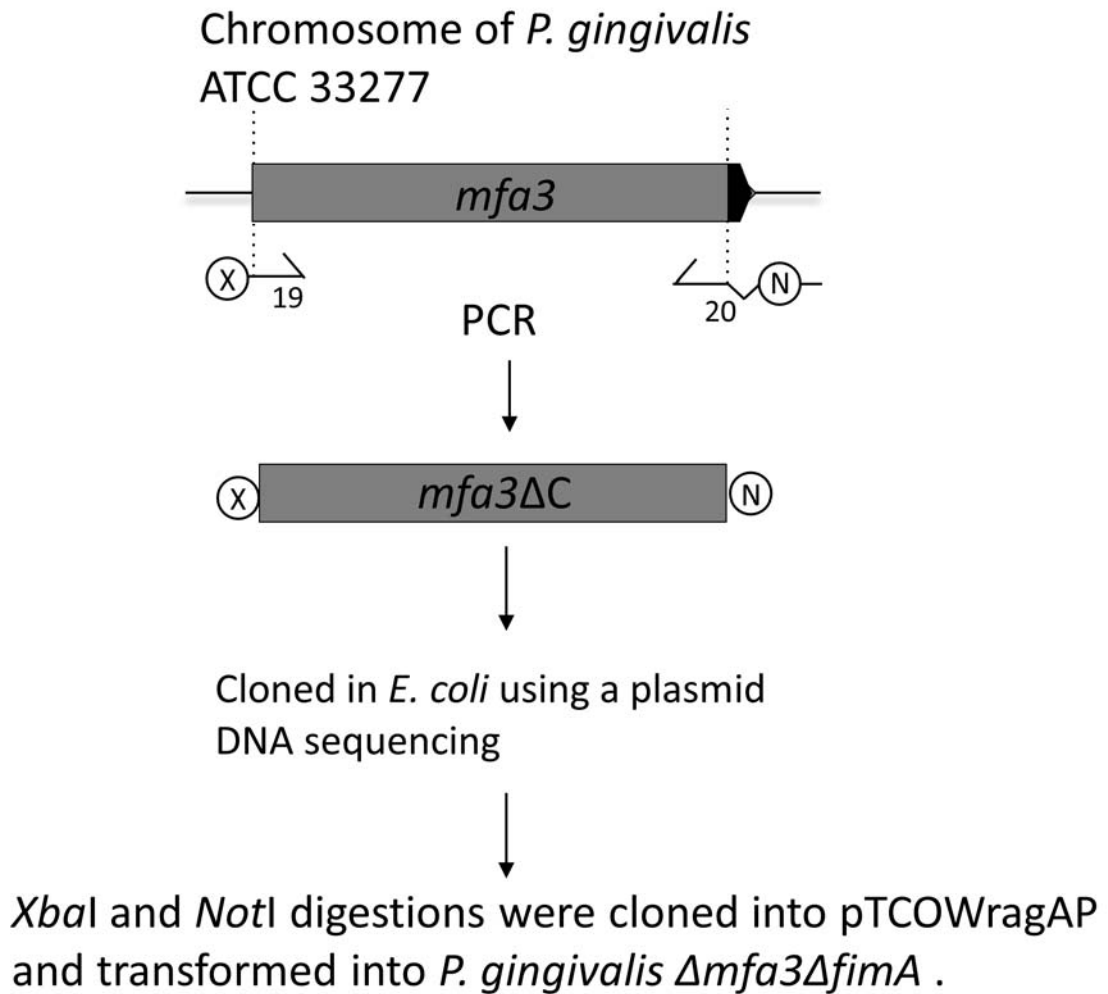

**Supplementary figure S14.** Construction of *+mfa3ΔC* *P. gingivalis* strain. Small arrows indicate the annealing sites of the primers. X and N show *Xba*I and *Not*I restriction sites, respectively.

### Construction of $\Delta mfa2\Delta fimA$

Chromosome of *P. gingivalis*  
ATCC 33277

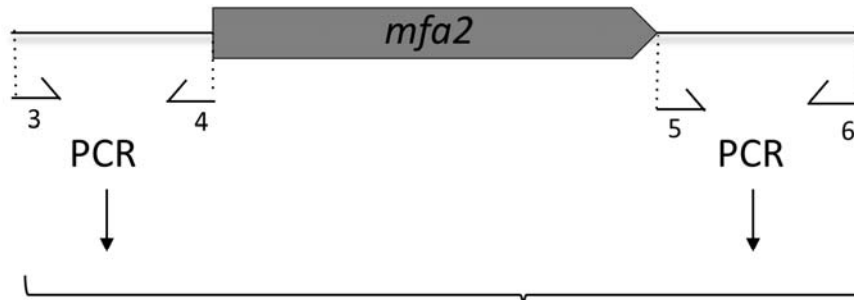

Ligated by overlap extension PCR

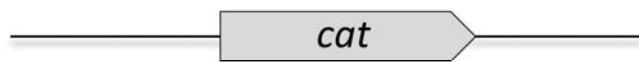

Cloned in *E. coli* using a plasmid

Transformed *P. gingivalis* KDP98

Selected by chloramphenicol  
DNA sequencing

Obtained *mfa2*-deletion mutant of  $\Delta mfa2\Delta fimA$

**Supplementary figure S15.** Construction of  $\Delta mfa2\Delta fimA$  *P. gingivalis* strain. Small arrows indicate the annealing sites of primers. *cat* confers chloramphenicol resistance to *P. gingivalis*.

## Construction of *+mfa2*

Chromosome of *P. gingivalis*  
ATCC 33277

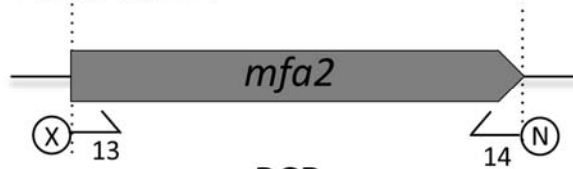

PCR

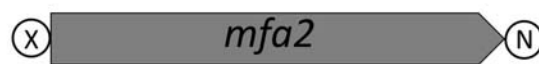

Cloned in *E. coli* using a plasmid  
DNA sequencing

*Xba*I and *Not*I digestions were cloned into pTCOWragAP  
and transformed into *P. gingivalis*  $\Delta mfa2\Delta fimA$   
Obtained *+mfa2*

**Supplementary figure S16.** Construction of *+mfa2* *P. gingivalis* strain. Small arrows indicate the annealing sites of the primers. X and N show *Xba*I and *Not*I restriction sites, respectively.

### Construction of +*mfa2C54A*

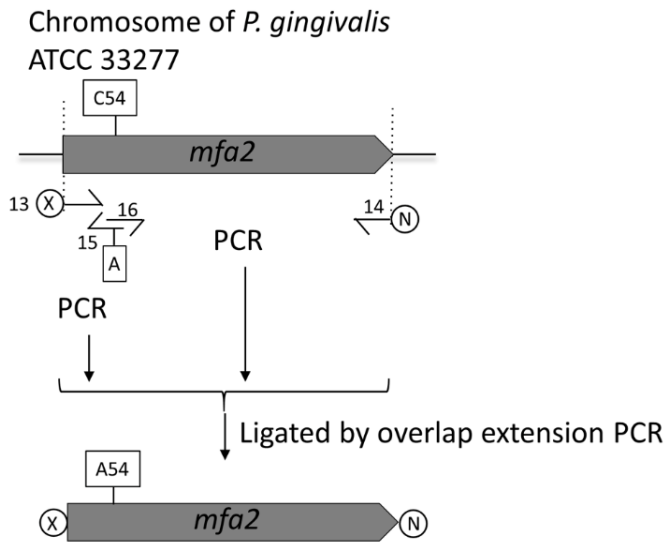

### Construction of +*mfa2C285A*

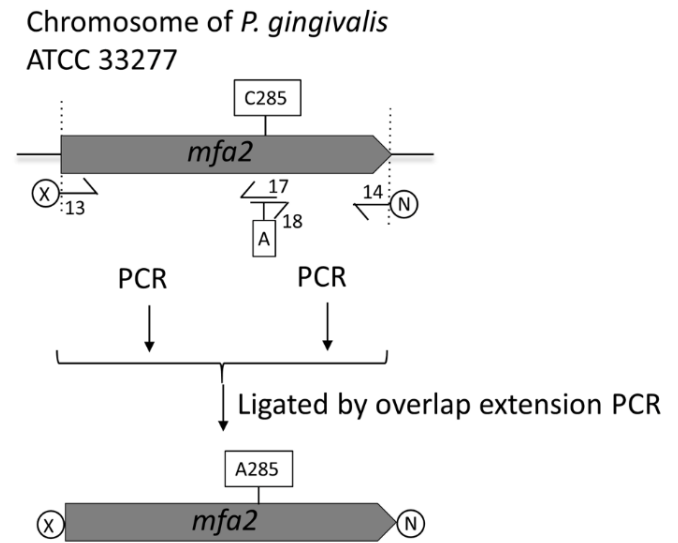

Cloned in *E. coli* using a plasmid  
DNA sequencing

*Xba*I and *Not*I digestions were cloned into pTCOWragAP  
and transformed into *P. gingivalis*  $\Delta$ *mfa2* $\Delta$ *fimA*

**Supplementary figure S17.** Construction of +*mfa2C54A* and +*mfa2C285A* *P. gingivalis* strains. Small arrows indicate the annealing sites of the primers. X and N show *Xba*I and *Not*I restriction sites, respectively.

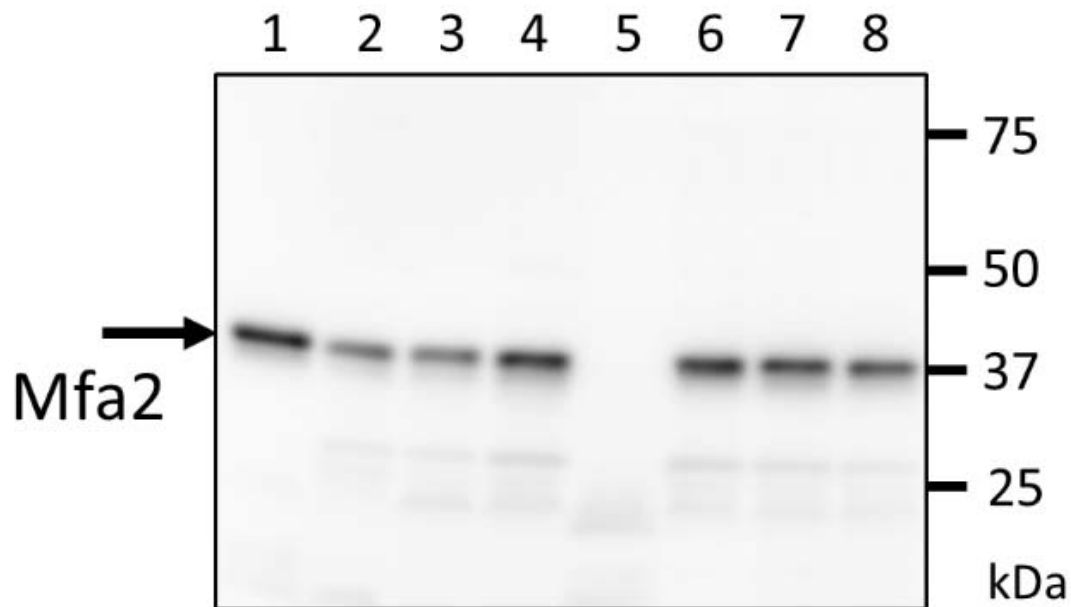

**Supplementary figure S18.** Confirmation of Mfa2 protein expression in mutant strains. Whole cell lysates were solubilized in SDS-buffer (+2BME), heated at 100°C for 5 min, separated by SDS-PAGE, blotted to a PVDF membrane and probed with a polyclonal antibody against Mfa2. Lanes: 1, JI-1; 2,  $\Delta mfa1\Delta fim$ ; 3, +*mfa1*; 4, +*mfa1* $\Delta C$ ; 5,  $\Delta mfa2\Delta fimA$  (negative control); 6, +*mfa2*; 7, +*mfa2C54A*; 8, +*mfa2C285A*.

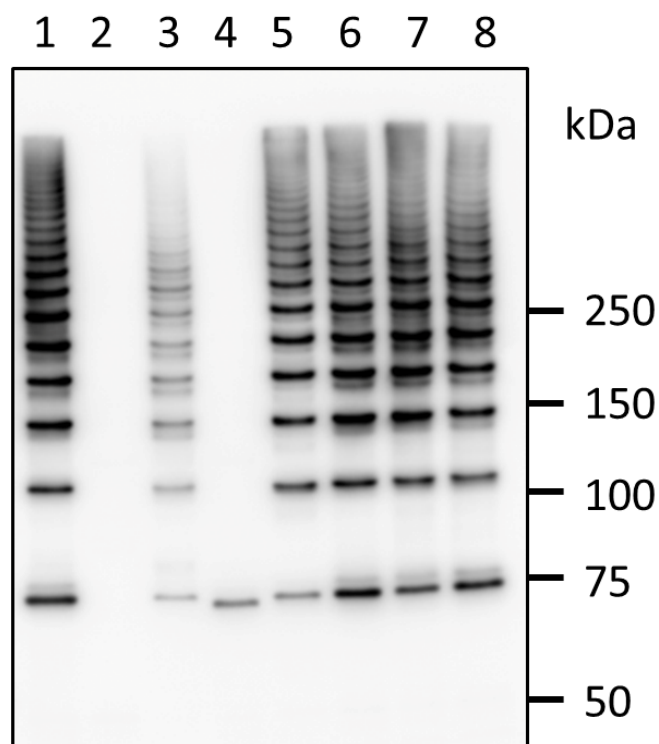

**Supplementary figure S19.** Immunoblot analysis of Mfa1 polymerization under non-reducing conditions. Whole cell lysates solubilized in SDS buffer (-2BME) were heated to 80°C for 5 min, separated by SDS-PAGE, blotted to a PVDF membrane and probed with a polyclonal Mfa1 fimbriae antibody. Lanes: 1, JI-1; 2,  $\Delta mfa1\Delta fim$ ; 3, +*mfa1*; 4, +*mfa1* $\Delta C$ ; 5,  $\Delta mfa2\Delta fimA$ ; 6, +*mfa2*; 7, +*mfa2C54A*; 8, +*mfa2C285A*.

**Supplementary Table S1:** Pairwise structural comparison between Mfa1 and other fimbrial proteins building up the Mfa1 fimbria of *P. gingivalis* ATCC33277. The structures of Mfa1, Mfa2 and Mfa3 and Mfa4<sup>2</sup>.

| Structure/PDB aligned with Mfa1Δ9 (shaft) | z-score | lali | nres | r.m.s.d. | % identity |
|-------------------------------------------|---------|------|------|----------|------------|
| Shaft mMfa1                               | 55.7    | 470  | 497  | 0.4      | 100        |
| Mfa2, anchor                              | 9.4     | 211  | 277  | 4.5      | 10         |
| Mfa3, tip                                 | 16.3    | 255  | 295  | 3.7      | 11         |
| Mfa4 (5dhm), tip                          | 13.6    | 228  | 287  | 3.4      | 15         |

**Supplementary Table S2:** Pairwise structural comparison between Mfa2 and other fimbrial proteins building up the Mfa1 fimbria of *P. gingivalis* ATCC33277. Statistics were obtained by DALI<sup>3</sup>.

| Structure/PDB aligned with Mfa2 (anchor) | z-score | lali | nres | r.m.s.d. | % identity |
|------------------------------------------|---------|------|------|----------|------------|
| Mfa1Δ9 (shaft)                           | 9.4     | 211  | 277  | 4.5      | 10         |
| Mfa3, tip                                | 11.8    | 212  | 277  | 4.9      | 11         |
| Mfa4 (5dhm), tip                         | 10.3    | 187  | 268  | 4.1      | 10         |

**Supplementary Table S3:** Pairwise structural comparison between Mfa3 and other fimbrial proteins building up the Mfa1 fimbria of *P. gingivalis* ATCC33277. Statistics were obtained by DALI<sup>3</sup>.

| Structure/PDB aligned with Mfa3 (tip) | z-score | lali | nres | r.m.s.d. | % identity |
|---------------------------------------|---------|------|------|----------|------------|
| Mfa1Δ9 (shaft)                        | 16.3    | 255  | 295  | 3.7      | 11         |
| Mfa2 (anchor)                         | 11.8    | 212  | 277  | 4.9      | 11         |
| Mfa4 (5dhm), tip                      | 14.4    | 191  | 266  | 2.5      | 20         |

**Supplementary Table S4.** Structural comparison between Mfa1 and other fimbrial proteins<sup>4</sup> as obtained by DALI<sup>3</sup>.

| Structure/PDB aligned with Mfa1Δ9 | organism                            | z-score | lali | nres | rmsd | % identity |
|-----------------------------------|-------------------------------------|---------|------|------|------|------------|
| BovFim3A shaft, 4jrf              | <i>Bacteroides ovatus</i>           | 22.6    | 325  | 479  | 3.3  | 22         |
| BdiFim3A shaft, 3liu              | <i>Parabacteroides distasonis</i>   | 16.0    | 262  | 373  | 3.7  | 16         |
| BegFim1A shaft, 4gpv              | <i>Bacteroides eggerthii</i>        | 14.6    | 254  | 328  | 3.8  | 14         |
| FimA, shaft 4q98                  | <i>Porphyromonas gingivalis</i> W83 | 14.7    | 256  | 357  | 3.4  | 18         |

**Supplementary Table 5:** Proteins structurally related to Mfa2 as obtained by DALI<sup>3</sup>.

| Structure/PDB aligned with Mfa2 | organism                            | z-score | lali | nres | rmsd | % identity |
|---------------------------------|-------------------------------------|---------|------|------|------|------------|
| BthFim2B anchor, 3gf8           | <i>Bacteroides thetaiotaomicron</i> | 24.4    | 262  | 284  | 2.7  | 21         |
| BthFim3B anchor, 4qdg           | <i>Bacteroides thetaiotaomicron</i> | 23.2    | 258  | 302  | 3.0  | 16         |
| BovFim2B anchor, 3pay           | <i>Bacteroides ovatus</i>           | 22.7    | 260  | 313  | 2.9  | 17         |

**Supplementary Table 6:** Proteins structurally related to Mfa3 as obtained by DALI<sup>3</sup>.

| Structure/PDB aligned with Mfa3 (tip) | organism                            | z-score | lali | nres | rmsd | % identity |
|---------------------------------------|-------------------------------------|---------|------|------|------|------------|
| BdiFim1C tip, 4jg5                    | <i>Parabacteroides distasonis</i>   | 17.8    | 241  | 336  | 3.5  | 15         |
| BovFim2C unknown,3up6                 | <i>Bacteroides ovatus</i>           | 17.6    | 248  | 324  | 3.0  | 12         |
| BdiFim1A, shaft, 3liu                 | <i>Parabacteroides distasonis</i>   | 17.3    | 246  | 372  | 3.5  | 15         |
| FimA, shaft, 4q98                     | <i>Porphyromonas gingivalis</i> W83 | 16.7    | 231  | 357  | 2.7  | 15         |



**Supplementary Table S7.** Primers used in this study.

| <b>Primer</b>                                              | <b>Sequence (5'-3')</b>                                                                                        | <b>Description of underline</b>                   | <b>Primer number in supplemental Figs.</b> |
|------------------------------------------------------------|----------------------------------------------------------------------------------------------------------------|---------------------------------------------------|--------------------------------------------|
| <b>Construction of recombinant proteins</b>                |                                                                                                                |                                                   |                                            |
| mMfa1F                                                     | AAA <u>ACCATGG</u> CGGGTGACGGACAGGAT                                                                           | <i>NcoI</i> site                                  |                                            |
| pMfa1F                                                     | AAA <u>ACCATGG</u> GTAAGAGGGCAATGGC                                                                            | <i>NcoI</i> site                                  |                                            |
| Mfa1R                                                      | AAA <u>AGGTACCT</u> TAGAGATCAACCTCATA                                                                          | <i>Acc65I</i> site                                |                                            |
| Mfa1Δ8R                                                    | AAA <u>AGGTACCT</u> TACCAAGGCAAAACTGTAAC                                                                       | <i>Acc65I</i> site                                |                                            |
| Mfa2F                                                      | AAA <u>ACCATGG</u> ATAAGATGATTTATGAC                                                                           | <i>NcoI</i> site                                  |                                            |
| Mfa2R                                                      | TTTT <u>GGTACCT</u> TAAAGTTCTATTTTCGTAAC                                                                       | <i>Acc65I</i> site                                |                                            |
| pMfa3F                                                     | AAA <u>ATCATG</u> AGAGGAGTTGATCCACAG                                                                           | <i>PagI</i> site                                  |                                            |
| Mfa3R                                                      | AAAA <u>AGGTACC</u> CTATTTCTTGATAAAAAC                                                                         | <i>Acc65I</i> site                                |                                            |
| <b>Construction of complemented strains of <i>mfa1</i></b> |                                                                                                                |                                                   |                                            |
| Mfa1WTxbF                                                  | TTAATATTAATCCTTTTAAACATTT <u>CTAGA</u> ATGAAG<br>TTAAACAAAATGTTTTG                                             | <i>XbaI</i> site                                  | 7                                          |
| Mfa1WTnoR                                                  | CACCCTCAAAAAGAAAATTTTACAG <u>CGGCCG</u> CTT<br>AGAGATCAACCTCATAGGAATG                                          | <i>NotI</i> site                                  | 8                                          |
| Mfa1ΔCnoR                                                  | CCCACCCTCAAAAAGAAAATTTTACAG <u>CGGCCG</u> C<br>TTAATGAACCTTCCAAGGCAAAACTGTAACC                                 | <i>NotI</i> site                                  | 9                                          |
| Mfa1R236AR                                                 | <u>ACCATCGCACGTGCTACAGACGCCTCCACCGTAA</u><br><u>CCTTGGCCT</u>                                                  | Ala mutation and overlapping region of Mfa1R236AR | 10                                         |
| Mfa1R236AF                                                 | <u>AGGCCAAGGTTACGGTGGAGGCGTCTGTAGCACG</u><br><u>TGCGATGGT</u>                                                  | Ala mutation and overlapping region of Mfa1R236AF | 11                                         |
| Mfa1W554AR                                                 | CACCCTCAAAAAGAAAATTTTACAG <u>CGGCCG</u> CTT<br>AGAGATCAACCTCATAGGAATGAACCTT <u>CGCAGG</u><br>CAAAACTGTAACCTCAA | <i>NotI</i> site and Ala mutation                 | 12                                         |
| <b>Construction of <i>Δmfa2ΔfimA</i></b>                   |                                                                                                                |                                                   |                                            |
| AGU01                                                      | ATGGAGAAAAAATCACTGGA                                                                                           |                                                   | 1                                          |
| AGU02                                                      | TTACGCCCCGCCCTGCCACTC                                                                                          |                                                   | 2                                          |
| Mfa2upF                                                    | GTCAGGTGCTAATGCTGCCTCG                                                                                         |                                                   | 3                                          |
| Mfa2upR                                                    | <u>CCAGTGATTTTTTCTCCAT</u> TGTTTTAAAAAATATA<br>GAGGG                                                           | Overlapping region of 5' end of <i>cat</i>        | 4                                          |
| Mfa2downF                                                  | <u>GCAGGGCGGGCGTA</u> AGAGAAAAAAGACCGGTT<br>CTTC                                                               | Overlapping region of 3' end of <i>cat</i>        | 5                                          |
| Mfa2downR                                                  | GGCCATGGCAGTCTGCATATTG                                                                                         |                                                   | 6                                          |

**Construction of complemented strains of *mfa2***

|            |                                                               |                                                   |    |
|------------|---------------------------------------------------------------|---------------------------------------------------|----|
| Mfa2WTxbF  | TTCTCCCACCCTCTATATTTTTTCTAGAAATGAACA<br>AACGGAAGCATATGG       | <i>Xba</i> I site                                 | 13 |
| Mfa2WTnoR  | GAAAGCGAGTGAAGAACCGGTCTGCGGCCGCTTA<br>AAGTTCTATTTTCGTA ACTATG | <i>Not</i> I site                                 | 14 |
| Mfa2C54AR  | <u>ATTTTCGGCAGCCTCAGTCTGAGAATAGAAGTTG</u>                     | Ala mutation and overlapping region of Mfa2C54AF  | 15 |
| Mfa2C54AF  | <u>GACTGAGGCTGCCGAAAATCCTTCTTATCCTGCG</u>                     | Ala mutation and overlapping region of Mfa2C54AR  | 16 |
| Mfa2C285AR | <u>AAGTCATTGATAGCGCGCAAGTTGATATTTTGAGC</u><br>ATAC            | Ala mutation and overlapping region of Mfa2C285AF | 17 |
| Mfa2C285AF | <u>CAACTTGCGCGCTATCAATGACTTCGATATAAGGT</u><br>TGG             | Ala mutation and overlapping region of Mfa2C285AR | 18 |

**Construction of +*mfa3*ΔC**

|           |                                                                                                     |                   |    |
|-----------|-----------------------------------------------------------------------------------------------------|-------------------|----|
| cMfa3F    | ATACACTTCTAGAAATGATGCAGCTTAAAAAGAGAT                                                                | <i>Xba</i> I site | 19 |
| Mfa3ΔCnoR | CACTCGTTAACAACGAGGCATATAACAAATACTTT<br>TTCATGCGGCCGCCTAGACCCCTGTTGCATTCAGA<br>TCCGGGTTATAATAAACCTCC | <i>Not</i> I site | 20 |

---

**Supplementary Table S8.** *Porphyromonas gingivalis* strains used in this study.

| Strain                   | Genotype and Relevant Description <sup>1</sup>                                                                                                                                                                                              | Reference  |
|--------------------------|---------------------------------------------------------------------------------------------------------------------------------------------------------------------------------------------------------------------------------------------|------------|
| Jl-1                     | <i>fimA</i> deletion mutant from ATCC 33277, Cp <sup>r</sup>                                                                                                                                                                                | 5          |
| KDP98                    | <i>fimA</i> deletion mutant from ATCC 33277, Em <sup>r</sup>                                                                                                                                                                                | 6          |
| $\Delta mfa1\Delta fim$  | <i>mfa1</i> and <i>fimA-E</i> deletion mutant, Cp <sup>r</sup> Em <sup>r</sup>                                                                                                                                                              | 7          |
| $\Delta mfa2\Delta fimA$ | <i>mfa2</i> and <i>fimA</i> deletion mutant, Cp <sup>r</sup> Em <sup>r</sup>                                                                                                                                                                | This study |
| $\Delta mfa3\Delta fimA$ | <i>mfa3</i> and <i>fimA</i> deletion mutant, Cp <sup>r</sup> Em <sup>r</sup>                                                                                                                                                                | 8          |
| + <i>mfa1</i>            | $\Delta mfa1\Delta fim$ complemented with intact <i>mfa1</i> through pTCOWragAP:: <i>mfa1</i> , Cp <sup>r</sup> Em <sup>r</sup> Tc <sup>r</sup> . A control strain for + <i>mfa1</i> $\Delta C$ , + <i>mfa1R236A</i> and + <i>mfa1W554A</i> | This study |
| + <i>mfa1</i> $\Delta C$ | $\Delta mfa1\Delta fim$ complemented with <i>mfa1</i> deleting C-terminal region (SYEVDL), Cp <sup>r</sup> Em <sup>r</sup> Tc <sup>r</sup>                                                                                                  | This study |
| + <i>mfa1R236A</i>       | $\Delta mfa1\Delta fim$ complemented with <i>mfa1</i> point mutation R236A, Cp <sup>r</sup> Em <sup>r</sup> Tc <sup>r</sup>                                                                                                                 | This study |
| + <i>mfa1W554A</i>       | $\Delta mfa1\Delta fim$ complemented with <i>mfa1</i> point mutation W554A, Cp <sup>r</sup> Em <sup>r</sup> Tc <sup>r</sup>                                                                                                                 | This study |
| + <i>mfa2</i>            | $\Delta mfa2\Delta fimA$ complemented with intact <i>mfa2</i> through pTCOWragAP:: <i>mfa2</i> , Cp <sup>r</sup> Em <sup>r</sup> Tc <sup>r</sup> . A control strain for + <i>mfa2</i> C54A and C285A.                                       | This study |
| + <i>mfa2</i> C54A       | $\Delta mfa2\Delta fimA$ complemented with <i>mfa2</i> point mutation C54A, Cp <sup>r</sup> Em <sup>r</sup> Tc <sup>r</sup>                                                                                                                 | This study |
| + <i>mfa2</i> C285A      | $\Delta mfa2\Delta fimA$ complemented with <i>mfa2</i> point mutation C285A, Cp <sup>r</sup> Em <sup>r</sup> Tc <sup>r</sup>                                                                                                                | This study |
| + <i>mfa3</i>            | $\Delta mfa3\Delta fimA$ complemented with intact <i>mfa3</i> through pTCOWragAP:: <i>mfa3</i> , Cp <sup>r</sup> Em <sup>r</sup> Tc <sup>r</sup> . A control strain for + <i>mfa3</i> $\Delta C$ .                                          | 8          |
| + <i>mfa3</i> $\Delta C$ | $\Delta mfa3\Delta fimA$ complemented with <i>mfa3</i> deleting C-terminal region (VPDKVFIKK), Cp <sup>r</sup> Em <sup>r</sup> Tc <sup>r</sup>                                                                                              | This study |

<sup>1</sup> Cp<sup>r</sup>, chloramphenicol resistance; Em<sup>r</sup>, erythromycin resistance; Tc<sup>r</sup>, tetracycline resistance.

<sup>2</sup> ATCC, American Type Culture Collection.

1. Pei, J., Kim, B.H. & Grishin, N.V. PROMALS3D: a tool for multiple protein sequence and structure alignments. *Nucleic Acids Res* **36**, 2295-300 (2008).
2. Kloppsteck, P., Hall, M., Hasegawa, Y. & Persson, K. Structure of the fimbrial protein Mfa4 from *Porphyromonas gingivalis* in its precursor form: implications for a donor-strand complementation mechanism. *Sci Rep* **6**, 22945 (2016).
3. Holm, L. & Rosenstrom, P. Dali server: conservation mapping in 3D. *Nucleic Acids Res* **38**, W545-9 (2010).
4. Xu, Q. et al. A Distinct Type of Pilus from the Human Microbiome. *Cell* **165**, 690-703 (2016).
5. Hasegawa, Y. et al. Anchoring and length regulation of *Porphyromonas gingivalis* Mfa1 fimbriae by the downstream gene product Mfa2. *Microbiology* **155**, 3333-47 (2009).
6. Watanabe-Kato, T. et al. Isolation and characterization of transposon-induced mutants of *Porphyromonas gingivalis* deficient in fimbriation. *Microb Pathog* **24**, 25-35 (1998).
7. Nagano, K. et al. *Porphyromonas gingivalis* FimA fimbriae: fimbrial assembly by fimA alone in the fim gene cluster and differential antigenicity among fimA genotypes. *PLoS One* **7**, e43722 (2012).
8. Hasegawa, Y. et al. Localization and function of the accessory protein Mfa3 in *Porphyromonas gingivalis* Mfa1 fimbriae. *Mol Oral Microbiol* **28**, 467-80 (2013).
